# Supplementary material for: Quantifying the cooperative subunit action in a multimeric membrane receptor
Source: PubMed Central journal article supplement (PMC4746656; doi:10.1038/srep20974), 2016-02-09
Supplement: srep20974-s1.pdf [file srep20974-s1.pdf]

## **Supplementary Information**

to the manuscript

### **Quantifying the cooperative subunit action in a multimeric membrane receptor**

by

Nisa Wongsamitkul<sup>1</sup>, Vasilica Nache<sup>1</sup>, Thomas Eick, Sabine Hummert, Eckhard Schulz, Ralf Schmauder, Jana Schirmeyer, Thomas Zimmer and Klaus Benndorf<sup>\*</sup>

<sup>\*</sup> E-Mail: Klaus.Benndorf@med.uni-jena.de

<sup>1</sup> These authors contributed equally to this work

## Supplementary Figures

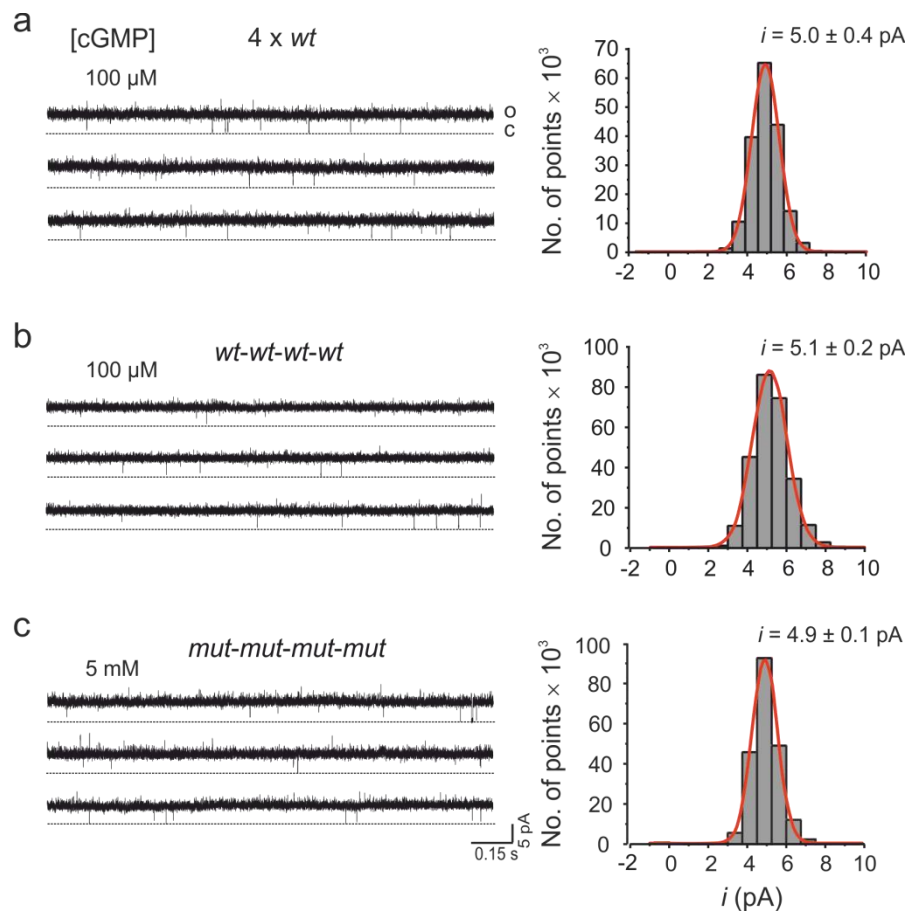

### Supplementary Fig. 1. Single-channel recordings.

Three representative traces of single-channel activity and corresponding amplitude histograms for  $4 \times wt$  (a),  $wt-wt-wt-wt$  (b) and  $mut-mut-mut-mut$  (c) at the indicated cGMP concentrations.

“c” and “o” indicate the current level for closed and open channels, respectively. The

amplitude of the single-channel current,  $i$  (see diagrams right) for all tested constructs is

indistinguishable. Also the open probability for the constructs in a to c are closely similar

( $4 \times wt$ :  $0.99 \pm 0.002$ ,  $100 \mu M$  cGMP;  $N = 4$ ;  $wt-wt-wt-wt$ :  $0.99 \pm 0.002$ ,  $100 \mu M$  cGMP,  $N = 4$ ;

$mut-mut-mut-mut$ :  $0.99 \pm 0.003$ ,  $5$  mM cGMP,  $N = 5$ ).

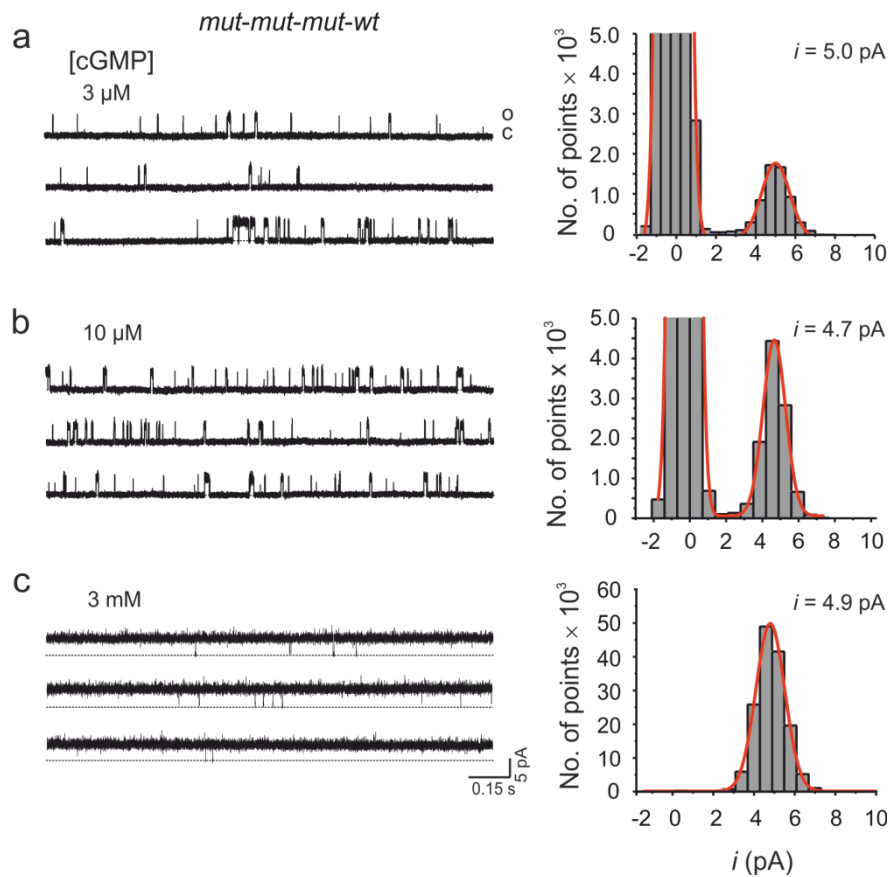

**Supplementary Figure 2. Single-channel recordings of *mut-mut-mut-wt*.**

Three representative traces of single-channel activity and corresponding amplitude histograms under control conditions and at the indicated three cGMP concentrations. “c” and “o” indicate the current level for closed and open channels, respectively. The amplitude of the single-channel current  $i$  does not depend on the cGMP concentration and is similar to  $4 \times wt$ -channels (Supplementary Fig. 1a).

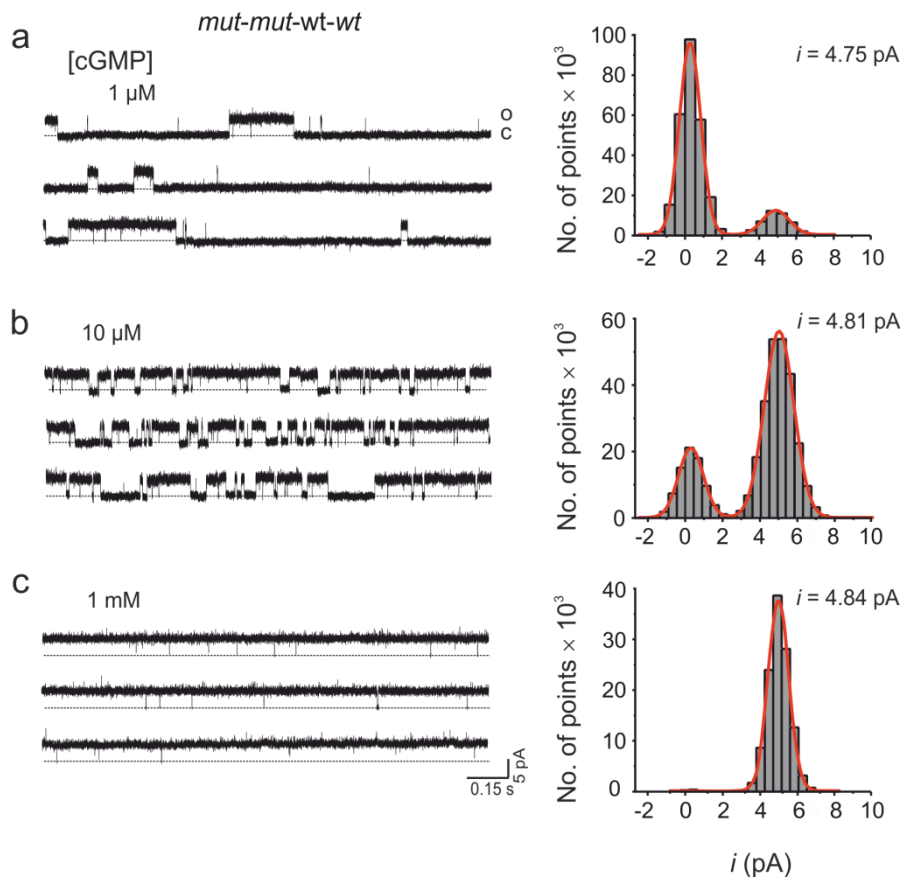

**Supplementary Figure 3. Single-channel recordings of *mut-mut-wt-wt*.**

Three representative traces of single-channel activity and corresponding amplitude histograms under control conditions and at the indicated three cGMP concentrations. “c” and “o” indicate the current level for closed and open channels, respectively. The amplitude of the single-channel current  $i$  does not depend on the cGMP concentration and is similar to *wt*-channels and all other concatamers (Supplementary Fig. 1a).

## Supplementary Tables

**Supplementary Table 1a. Effect of an increasing number of *mut*-subunits**

| Channel                | $EC_{50} / EC_{50H}$<br>( $\mu\text{M}$ ) | $n / n_H$ | $EC_{50L}$<br>( $\mu\text{M}$ ) | $n_L$ | $A$  | $N$  |
|------------------------|-------------------------------------------|-----------|---------------------------------|-------|------|------|
| $4 \times wt$          | 1.92                                      | 2.04      |                                 |       |      | 5-9  |
| $4 \times mut$         | 606.7                                     | 2.65      |                                 |       |      | 6-8  |
| <i>wt-wt-wt-wt</i>     | 1.97                                      | 2.27      |                                 |       |      | 5-14 |
| <i>mut-wt-wt-wt</i>    | 2.87                                      | 1.44      |                                 |       |      | 7-12 |
| <i>mut-mut-wt-wt</i>   | 6.79                                      | 1.30      |                                 |       |      | 5-10 |
| <i>mut-mut-mut-wt</i>  | 44.3                                      | 1 (fixed) | 354.1                           | 2.15  | 0.63 | 7-33 |
| <i>mut-mut-mut-mut</i> | 687.7                                     | 2.35      |                                 |       |      | 5-12 |

Fit parameters for concentration-activation relationships in Fig. 1a. The channels are either built of monomers ( $4 \times wt$ ,  $4 \times mut$ ) or of concatenated subunits forming tetrameric concatamers (*wt-wt-wt-wt*, *mut-wt-wt-wt*, *mut-mut-wt-wt*, *mut-mut-mut-wt*, *mut-mut-mut-mut*). Apart from *mut-mut-mut-wt* the relationships were fitted with Equation 1. For *mut-mut-mut-wt* the relationship was fitted with Equation 2 yielding two components.  $N$  indicates the number of patches per data point.

**Supplementary Table 1b. Concatamers assemble as tetrameric channels.**

| Channel                                              | $EC_{50} / EC_{50H}$<br>( $\mu\text{M}$ ) | $n / n_H$ | $EC_{50L}$<br>( $\mu\text{M}$ ) | $n_L$ | $A$ | $N$   |
|------------------------------------------------------|-------------------------------------------|-----------|---------------------------------|-------|-----|-------|
| <i>wt-wt-wt-wt</i>                                   | 1.97                                      | 2.27      |                                 |       |     | 5-14  |
| <i>mut-mut-mut-mut</i>                               | 687.7                                     | 2.35      |                                 |       |     | 5-12  |
| <i>wt-wt-wt-wt</i><br>plus<br><i>mut-mut-mut-mut</i> | 1.45                                      | 1.84      | 771.2                           | 2.69  | 0.5 | 14-21 |

Fit parameters for concentration-activation relationships in Fig. 1b.

**Supplementary Table 1c. The position of *wt*-subunits is irrelevant for the concatamer function.**

| <b>Channel</b>        | <b><math>EC_{50} / EC_{50H}</math><br/>(<math>\mu\text{M}</math>)</b> | <b><math>n / n_H</math></b> | <b><math>EC_{50L}</math><br/>(<math>\mu\text{M}</math>)</b> | <b><math>n_L</math></b> | <b><math>A</math></b> | <b><math>N</math></b> |
|-----------------------|-----------------------------------------------------------------------|-----------------------------|-------------------------------------------------------------|-------------------------|-----------------------|-----------------------|
| <i>mut-mut-mut-wt</i> | 44.3                                                                  | 1 (fixed)                   | 354.1                                                       | 2.15                    | 0.63                  | 7-33                  |
| <i>mut-mut-wt-mut</i> | 49.6                                                                  | 1 (fixed)                   | 251.5                                                       | 1.48                    | 0.51                  | 5-18                  |
| <i>mut-wt-mut-mut</i> | 80.9                                                                  | 1 (fixed)                   | 352.0                                                       | 2.63                    | 0.88                  | 4-13                  |
| <i>wt-mut-mut-mut</i> | 20.4                                                                  | 1 (fixed)                   | 163.2                                                       | 1.50                    | 0.29                  | 4-14                  |
| <i>mut-mut-wt-wt</i>  | 6.79                                                                  | 1.30                        |                                                             |                         |                       | 5-10                  |
| <i>mut-wt-mut-wt</i>  | 8.61                                                                  | 1.34                        |                                                             |                         |                       | 5-8                   |
| <i>wt-mut-wt-mut</i>  | 8.76                                                                  | 1.20                        |                                                             |                         |                       | 6-18                  |
| <i>wt-wt-mut-mut</i>  | 7.74                                                                  | 1.31                        |                                                             |                         |                       | 5-10                  |

Fit parameters for concentration-activation relationships in Fig. 1c.

## Supplementary Methods

### Global fit of concentration-activation relationships

Concentration-activation relationships ( $I/I_{\max} = f([cGMP])$ ) of the five concatamers *wt-wt-wt-wt*, *mut-wt-wt-wt*, *mut-mut-wt-wt*, *mut-mut-mut-wt*, and *mut-mut-mut-mut* were globally fitted with the five respective models shown in Figure 2a. The models are intimately coupled by common equilibrium constants. The open probabilities were computed according to the

following equation:

$$P_{o,kwt}(L) = \frac{\mathbf{E} \bullet \mathbf{V}_{kwt}(L)}{(\mathbf{1} + \mathbf{E}) \bullet \mathbf{V}_{kwt}(L)}. \quad \text{Equation S1}$$

A bold point indicates a dot product of two vectors,  $L$  represents the cGMP concentration in  $M$ ,  $\mathbf{E}$  is the vector of the equilibrium constants for the closed-open isomerizations  $E_0$ ,  $E_1$ ,  $E_2$ ,  $E_3$ , and  $E_4$  and  $\mathbf{1}$  is a vector consisting of unities:

$$\mathbf{E} = \begin{pmatrix} E_0 \\ E_1 \\ E_2 \\ E_3 \\ E_4 \end{pmatrix}, \quad \mathbf{1} + \mathbf{E} = \begin{pmatrix} 1 + E_0 \\ 1 + E_1 \\ 1 + E_2 \\ 1 + E_3 \\ 1 + E_4 \end{pmatrix} \quad \text{Equation S2}$$

For each  $k = 4, \dots, 0$  a submodel specific vector  $\mathbf{V}_{kwt}(L)$  is defined.

4wt-submodel:

$$\mathbf{V}_{4wt}(L) = \begin{pmatrix} 1 \\ 4LK_{A1H} \\ 6L^2K_{A2H}K_{A1H} \\ 4L^3K_{A3H}K_{A2H}K_{A1H} \\ L^4K_{A4H}K_{A3H}K_{A2H}K_{A1H} \end{pmatrix} \quad \text{Equation S3}$$

3wt-submodel:

$$\mathbf{V}_{3wt}(L) = \begin{pmatrix} 1 \\ L(3K_{A1H} + K_{A1L}) \\ 3L^2K_{A2H}(K_{A1H} + K_{A1L}) \\ L^3K_{A3H}K_{A2H}(K_{A1H} + 3K_{A1L}) \\ L^4K_{A4H}K_{A3H}K_{A2H}K_{A1L} \end{pmatrix} \quad \text{Equation S4}$$

2wt-submodel:

$$\mathbf{V}_{2wt}(L) = \begin{pmatrix} 1 \\ 2L(K_{A1H} + K_{A1L}) \\ L^2(K_{A2H}K_{A1H} + 4K_{A2H}K_{A1L} + K_{A2L}K_{A1L}) \\ 2L^3K_{A3L}K_{A2H}(K_{A1H} + K_{A1L}) \\ L^4K_{A4L}K_{A3L}K_{A2H}K_{A1H} \end{pmatrix} \quad \text{Equation S5}$$

1wt-submodel:

$$\mathbf{V}_{1wt}(L) = \begin{pmatrix} 1 \\ L(K_{A1H} + 3K_{A1L}) \\ 3L^2K_{A2L}(K_{A1H} + K_{A1L}) \\ L^3K_{A3L}K_{A2L}(3K_{A1H} + K_{A1L}) \\ L^4K_{A4L}K_{A3L}K_{A2L}K_{A1H} \end{pmatrix} \quad \text{Equation S6}$$

0wt-submodel:

$$\mathbf{V}_{0wt}(L) = \begin{pmatrix} 1 \\ 4LK_{A1L} \\ 6L^2K_{A2L}K_{A1L} \\ 4L^3K_{A3L}K_{A2L}K_{A1L} \\ L^4K_{A4L}K_{A3L}K_{A2L}K_{A1L} \end{pmatrix} \quad \text{Equation S7}$$

$K_{A1H}$ ,  $K_{A2H}$ ,  $K_{A3H}$ ,  $K_{A4H}$ ,  $K_{A1L}$ ,  $K_{A2L}$ ,  $K_{A3L}$ , and  $K_{A4L}$  are the equilibrium association constants for the four high- and low affinity binding sites, respectively.

A Levenberg-Marquardt algorithm<sup>1,2</sup> was used to optimize the parameters of the model. The  $\chi^2$  value was calculated from the fitted curves according to

$$\chi^2 = \sum_{i=1}^N \frac{(P_{o,m}(L_i) - P_{o,c}(L_i))^2}{\sigma_i^2} . \quad \text{Equation S8}$$

$P_{o,m}$  are the normalized measured open probabilities and  $P_{o,c}$  are the estimated open probabilities calculated according to Equation S1. The square of the deviations at a concentration  $L_i$  was weighted by the reciprocal squared values of the observed standard error



of mean ( $\sigma_i$ ) before adding over all  $N$  data points of all concatamers. In the fit procedure  $\chi^2$  was minimized. The reduced chi-square,  $\chi_r^2$ , was calculated by dividing  $\chi^2$  by the degrees of freedom (number of parameters subtracted from the number of data points). In the global fit  $\chi_r^2$  was 3.44.

The following strategy was used to reduce the number of parameters in the system of equations with 13 equilibrium constants:

1. The principle of microscopic reversibility delivered the following relation between the association constants

$$\frac{K_{A1H}}{K_{A1L}} = \frac{K_{A2H}}{K_{A2L}} = \frac{K_{A3H}}{K_{A3L}} = \frac{K_{A4H}}{K_{A4L}}. \quad \text{Equation S9}$$

Accordingly, three association constants could be expressed by other constants.

2. The equilibrium constants  $E_0$  and  $E_5$  were set according to the open probabilities determined from single-channel recordings being  $1.7 \times 10^{-5}$  and  $9.9 \times 10^1$ .
3.  $E_4$  was set to  $E_5$  to improve the determinateness.
4. To further increase the determinateness,  $K_{A3H}$  was set to  $K_{A4H}$ . According to Equation S9  $K_{A3L}$  must then be equal to  $K_{A4L}$ . This assumption reduced the number of parameters by one.

As a result, only six equilibrium constants remained as free parameters.

## Supplementary References

1. Brown KM, Dennis JE. Derivative-free analogues of the Levenberg-Marquardt and Gauss algorithmus or nonlinear least squares approximation. *Num Math* **18**, 289-297 (1972).
2. Press WH, Teukolsky SA, Vetterling WT, Flannery BP. Numerical Recipes in C: The Art of Scientific Computing. Cambridge University Press, 685 (2002).
